# Supplementary material for: Susceptibility of Commensal E. coli Isolated from Conventional, Antibiotic-Free, and Organic Meat Chickens on Farms and at Slaughter toward Antimicrobials with Public Health Relevance
Source: MDPI journal article supplement (doi:10.3390/antibiotics10111321), 2021-10-29
Supplement: s1 [file s1]

**Table S1.** Distribution of minimal inhibitory concentration (MIC) of *E. coli* strains isolated from organic, antibiotic-free and conventional systems toward the selected antimicrobials.

|                          | Organic               |                       | Antibiotic-FREE       |                      | Conventional          |                       |
|--------------------------|-----------------------|-----------------------|-----------------------|----------------------|-----------------------|-----------------------|
| Antimicrobials           | MIC values            |                       | MIC values            |                      | MIC values            |                       |
| <b>Tigecycline</b>       | 1-4 µg/mL<br>29.3%    | ≥ 8 µg/mL<br>0%       | 1-4 µg/mL<br>20.7%    | ≥ 8 µg/mL<br>0%      | 1-4 µg/mL<br>10.3%    | ≥ 8 µg/mL<br>0%       |
| <b>Colistin</b>          | >2 µg/mL<br>0%        |                       | >2 µg/mL<br>0%        |                      | >2 µg/mL<br>0%        |                       |
| <b>Meropenem</b>         | ≥16 µg/mL<br>0%       |                       | ≥16 µg/mL<br>0%       |                      | ≥16 µg/mL<br>0%       |                       |
| <b>Cefotaxime</b>        | ≥4 µg/mL<br>29.3%     |                       | ≥4 µg/mL<br>36.2%     |                      | ≥4 µg/mL<br>51.7%     |                       |
| <b>Ceftazidime</b>       | ≥8 µg/mL<br>8.6%      |                       | ≥8 µg/mL<br>10.34%    |                      | ≥8 µg/mL<br>31.%      |                       |
| <b>Ampicillin</b>        | 16-32 µg/mL<br>0%     | ≥ 64 µg/mL<br>72.4%   | 16-32 µg/mL<br>0%     | ≥ 64 µg/mL<br>70.7%  | 16-32 µg/mL<br>0%     | ≥ 64 µg/mL<br>84.5%   |
| <b>Nalidixic Acid*</b>   | 32-64 µg/mL<br>6.9%   | ≥ 128 µg/mL<br>39.7%  | 32-64 µg/mL<br>0      | ≥ 128 µg/mL<br>58.6% | 32-64 µg/mL<br>0%     | ≥ 128 µg/mL<br>56.9%  |
| <b>Ciprofloxacin</b>     | 1-4 µg/mL<br>20.7%    | ≥ 8 µg/mL<br>19.0%    | 1-4 µg/mL<br>19.0%    | ≥ 8 µg/mL<br>22.40%  | 1-4 µg/mL<br>25.9%    | ≥ 8 µg/mL<br>32.7%    |
| <b>Tetracycline*</b>     | 16-32 µg/mL<br>36.20% | ≥ 64 µg/mL<br>50.00%  | 16-32 µg/mL<br>29.30% | ≥ 64 µg/mL<br>51.70% | 16-32 µg/mL<br>34.50% | ≥ 64 µg/mL<br>43.10%  |
| <b>Azithromycin*</b>     | 32-64 µg/mL<br>8.60%  | > 64 µg/mL<br>20.7%   | 32-64 µg/mL<br>3.40%  | > 64 µg/mL<br>6.9%   | 32-64 µg/mL<br>6.9%   | > 64 µg/mL<br>0%      |
| <b>Gentamicin</b>        | 4-16 µg/mL<br>19%     | ≥ 32 µg/mL<br>13.8%   | 4-16 µg/mL<br>13.8%   | ≥ 32 µg/mL<br>8.6%   | 4-16 µg/mL<br>5.2%    | ≥ 32 µg/mL<br>6.9%    |
| <b>Sulfamethoxazole*</b> | 512 µg/mL<br>5.2%     | ≥ 1024 µg/mL<br>77.6% | 512 µg/mL<br>0%       | ≥ 1024 µg/mL<br>81%  | 512 µg/mL<br>9%       | ≥ 1024 µg/mL<br>63.4% |
| <b>Chloramphenicol</b>   | 16-64 µg/mL<br>24.2%  | ≥ 128 µg/mL<br>22.4%  | 16-64 µg/mL<br>6.9%   | ≥ 128 µg/mL<br>31.%  | 16-64 µg/mL<br>44.8%  | ≥ 128 µg/mL<br>22.4%  |
| <b>Trimethoprim</b>      | 8-16 µg/mL<br>17.2%   | ≥ 32 µg/mL<br>50%     | 8-16 µg/mL<br>6.9%    | ≥ 32 µg/mL<br>55.2%  | 8-16 µg/mL<br>5%      | ≥ 32 µg/mL<br>58.8%   |

\* based on the CLSI clinical breakpoint.

**Table S2.** Resistance patterns in *E. coli* isolated from antibiotic-free (AF) organic (O), and conventional (C) samples.

| System  |                        |        |   |       |                        |                                  |                 |   |                        |   |       |   |       |
|---------|------------------------|--------|---|-------|------------------------|----------------------------------|-----------------|---|------------------------|---|-------|---|-------|
| AF      |                        |        |   |       |                        | O                                |                 |   |                        |   |       |   |       |
| C       |                        |        |   |       |                        | Antimicrobial Resistance Pattern |                 |   |                        |   |       |   |       |
| AF      |                        |        |   |       |                        | O                                |                 |   |                        |   |       |   |       |
| C       |                        |        |   |       |                        | Antimicrobial Resistance Pattern |                 |   |                        |   |       |   |       |
| Pattern | <i>E. coli</i><br>(No) |        | % |       | <i>E. coli</i><br>(No) |                                  | %               |   | <i>E. coli</i><br>(No) |   | %     |   |       |
|         |                        |        |   |       |                        |                                  |                 |   |                        |   |       |   |       |
| 2       | 3                      | 5.10%  | 1 | 1.70% | 1                      | 1.70%                            | BL/QUIN         | 2 | 3.40%                  | 0 | 0.00% | 0 | 0.00% |
|         |                        |        |   |       |                        |                                  | TGC/CHL         | 0 | 0.00%                  | 1 | 1.70% | 0 | 0.00% |
|         |                        |        |   |       |                        |                                  | TET/AZI         | 1 | 1.70%                  | 0 | 0.00% | 0 | 0.00% |
|         |                        |        |   |       |                        |                                  | BL/CHL          | 0 | 0.00%                  | 0 | 0.00% | 1 | 1.70% |
| 3       | 8                      | 13.60% | 4 | 6.80% | 8                      | 13.60%                           | BL/CN/TMP       | 0 | 0.00%                  | 1 | 1.70% | 0 | 0.00% |
|         |                        |        |   |       |                        |                                  | BL/QUIN/TMP     | 0 | 0.00%                  | 0 | 0.00% | 1 | 1.70% |
|         |                        |        |   |       |                        |                                  | BL/QUIN/TET     | 0 | 0.00%                  | 0 | 0.00% | 3 | 5.10% |
|         |                        |        |   |       |                        |                                  | BL/QUIN/SMX     | 0 | 0.00%                  | 0 | 0.00% | 1 | 1.70% |
|         |                        |        |   |       |                        |                                  | BL/SMX/TMP      | 1 | 1.70%                  | 0 | 0.00% | 0 | 0.00% |
|         |                        |        |   |       |                        |                                  | BL/SMX/CHL      | 1 | 1.70%                  | 0 | 0.00% | 1 | 1.70% |
|         |                        |        |   |       |                        |                                  | TGC/BL/TET      | 1 | 1.70%                  | 0 | 0.00% | 0 | 0.00% |
|         |                        |        |   |       |                        |                                  | TGC/QUIN/TET    | 1 | 1.70%                  | 0 | 0.00% | 0 | 0.00% |
|         |                        |        |   |       |                        |                                  | SMX/CHL/TMP     | 1 | 1.70%                  | 0 | 0.00% | 1 | 1.70% |
|         |                        |        |   |       |                        |                                  | TGC/SMX/CHL     | 0 | 0.00%                  | 0 | 0.00% | 1 | 1.70% |
|         |                        |        |   |       |                        |                                  | TET/AZI/SMX     | 1 | 1.70%                  | 0 | 0.00% | 0 | 0.00% |
|         |                        |        |   |       |                        |                                  | TET/AZI/TMP     | 1 | 1.70%                  | 0 | 0.00% | 0 | 0.00% |
|         |                        |        |   |       |                        |                                  | TET/SMX/TMP     | 0 | 0.00%                  | 3 | 5.10% | 0 | 0.00% |
|         |                        |        |   |       |                        |                                  | TET/SMX/CHL     | 1 | 1.70%                  | 0 | 0.00% | 0 | 0.00% |
|         |                        |        |   |       |                        |                                  | BL/QUIN/CN/SMX  | 1 | 1.70%                  | 0 | 0.00% | 0 | 0.00% |
|         |                        |        |   |       |                        |                                  | CN/SMX/CHL/TMP  | 1 | 1.70%                  | 0 | 0.00% | 0 | 0.00% |
|         |                        |        |   |       |                        |                                  | BL/QUIN/TET/TMP | 0 | 0.00%                  | 1 | 1.70% | 1 | 1.70% |
|         |                        |        |   |       |                        |                                  | BL/QUIN/SMX/TMP | 0 | 0.00%                  | 1 | 1.70% | 0 | 0.00% |
|         |                        |        |   |       |                        |                                  | BL/QUIN/TET/SMX | 2 | 3.40%                  | 1 | 1.70% | 3 | 5.10% |
|         |                        |        |   |       |                        |                                  | BL/SMX/CHL/TMP  | 0 | 0.00%                  | 2 | 3.40% | 1 | 1.70% |

|   |    |        |    |        |    |        |                     |   |        |   |       |   |       |
|---|----|--------|----|--------|----|--------|---------------------|---|--------|---|-------|---|-------|
| 4 | 10 | 17.00% | 12 | 20.40% | 7  | 13.60% | BL/TET/SMX/CHL      | 1 | 1.70%  | 0 | 0.00% | 1 | 1.70% |
|   |    |        |    |        |    |        | BL/TET/SMX/TMP      | 3 | 5.10%  | 1 | 1.70% | 2 | 3.40% |
|   |    |        |    |        |    |        | QUIN/TET/CN/SMX     | 0 | 0.00%  | 1 | 1.70% | 0 | 0.00% |
|   |    |        |    |        |    |        | QUIN/TET/SMX/CHL    | 0 | 0.00%  | 1 | 1.70% | 0 | 0.00% |
|   |    |        |    |        |    |        | QUIN/TET/SMX/TMP    | 1 | 1.70%  | 0 | 0.00% | 0 | 0.00% |
|   |    |        |    |        |    |        | TGC/BL/TET/SMX      | 0 | 0.00%  | 1 | 1.70% | 0 | 0.00% |
|   |    |        |    |        |    |        | TGC/BL/CN/SMX       | 0 | 0.00%  | 1 | 1.70% | 0 | 0.00% |
|   |    |        |    |        |    |        | TGC/TET/AZI/TMP     | 0 | 0.00%  | 1 | 1.70% | 0 | 0.00% |
|   |    |        |    |        |    |        | TET/AZI/SMX/TMP     | 0 | 0.00%  | 1 | 1.70% | 0 | 0.00% |
|   |    |        |    |        |    |        | TGC/TET/SMX/TMP     | 1 | 1.70%  | 0 | 0.00% | 0 | 0.00% |
| 5 | 13 | 22.10% | 18 | 30.60% | 17 | 28.90% | BL/QUIN/CN/SMX/TMP  | 0 | 0.00%  | 1 | 1.70% | 0 | 0.00% |
|   |    |        |    |        |    |        | CN/QUIN/TET/SMX/TMP | 0 | 0.00%  | 0 | 0.00% | 1 | 1.70% |
|   |    |        |    |        |    |        | BL/QUIN/TET/CN/CHL  | 0 | 0.00%  | 1 | 1.70% | 0 | 0.00% |
|   |    |        |    |        |    |        | BL/QUIN/TET/CN/TMP  | 1 | 1.70%  | 0 | 0.00% | 0 | 0.00% |
|   |    |        |    |        |    |        | BL/QUIN/SMX/CHL/TMP | 0 | 0.00%  | 0 | 0.00% | 1 | 1.70% |
|   |    |        |    |        |    |        | BL/QUIN/TET/CN/SMX  | 1 | 1.70%  | 1 | 1.70% | 0 | 0.00% |
|   |    |        |    |        |    |        | BL/QUIN/TET/CHL/TMP | 0 | 0.00%  | 0 | 0.00% | 4 | 6.80% |
|   |    |        |    |        |    |        | BL/QUIN/TET/SMX/CHL | 1 | 1.70%  | 1 | 1.70% | 4 | 6.80% |
|   |    |        |    |        |    |        | BL/QUIN/TET/SMX/TMP | 6 | 10.20% | 3 | 5.10% | 1 | 1.70% |
|   |    |        |    |        |    |        | BL/TET/CN/SMX/CHL   | 0 | 0.00%  | 1 | 1.70% | 0 | 0.00% |
|   |    |        |    |        |    |        | BL/TET/CN/SMX/TMP   | 1 | 1.70%  | 0 | 0.00% | 0 | 0.00% |
|   |    |        |    |        |    |        | BL/TET/SMX/CHL/TMP  | 1 | 1.70%  | 3 | 5.10% | 4 | 6.80% |
|   |    |        |    |        |    |        | BL/TET/AZI/CHL/TMP  | 0 | 0.00%  | 0 | 0.00% | 1 | 1.70% |
|   |    |        |    |        |    |        | TGC/BL/QUIN/TET/AZI | 0 | 0.00%  | 2 | 3.40% | 0 | 0.00% |
|   |    |        |    |        |    |        | TGC/BL/QUIN/TET/TMP | 0 | 0.00%  | 0 | 0.00% | 1 | 1.70% |
|   |    |        |    |        |    |        | TGC/BL/QUIN/TET/SMX | 1 | 1.70%  | 0 | 0.00% | 0 | 0.00% |
|   |    |        |    |        |    |        | TGC/BL/TET/AZI/CHL  | 0 | 0.00%  | 1 | 1.70% | 0 | 0.00% |
|   |    |        |    |        |    |        | TGC/BL/TET/CN/TMP   | 0 | 0.00%  | 1 | 1.70% | 0 | 0.00% |
|   |    |        |    |        |    |        | TGC/TET/CN/SMX/TMP  | 0 | 0.00%  | 1 | 1.70% | 0 | 0.00% |
|   |    |        |    |        |    |        | TGC/BL/TET/SMX/TMP  | 1 | 1.70%  | 0 | 0.00% | 0 | 0.00% |

|   |    |        |    |        |    |        |                                 |   |        |   |       |   |        |
|---|----|--------|----|--------|----|--------|---------------------------------|---|--------|---|-------|---|--------|
|   |    |        |    |        |    |        | TGC/TET/AZI/SMX/TMP             | 0 | 0.00%  | 1 | 1.70% | 0 | 0.00%  |
|   |    |        |    |        |    |        | TET/AZI/SMX/CHL/TMP             | 0 | 0.00%  | 1 | 1.70% | 0 | 0.00%  |
|   |    |        |    |        |    |        | BL/QUIN/TET/CN/SMX/CHL          | 0 | 0.00%  | 0 | 0.00% | 1 | 1.70%  |
|   |    |        |    |        |    |        | BL/QUIN/TET/CN/SMX/TMP          | 3 | 5.10%  | 2 | 3.40% | 0 | 0.00%  |
|   |    |        |    |        |    |        | BL/QUIN/TET/AZI/CN/SMX          | 0 | 0.00%  | 2 | 3.40% | 0 | 0.00%  |
|   |    |        |    |        |    |        | BL/QUIN/TET/AZI/SMX/CHL         | 0 | 0.00%  | 1 | 1.70% | 0 | 0.00%  |
|   |    |        |    |        |    |        | BL/QUIN/TET/AZI/SMX/CHL         | 1 | 1.70%  | 0 | 0.00% | 0 | 0.00%  |
|   |    |        |    |        |    |        | BL/QUIN/TET/SMX/CHL/TMP         | 7 | 11.90% | 5 | 8.50% | 8 | 13.60% |
| 6 | 14 | 23.80% | 14 | 23.80% | 10 | 17.00% | BL/QUIN/TET/AZI/SMX/TMP         | 0 | 0.00%  | 1 | 1.70% | 0 | 0.00%  |
|   |    |        |    |        |    |        | TGC/BL/QUIN/TET/SMX/CHL         | 1 | 1.70%  | 0 | 0.00% | 1 | 1.70%  |
|   |    |        |    |        |    |        | BL/QUIN/TET/AZI/SMX/TMP         | 0 | 0.00%  | 1 | 1.70% | 0 | 0.00%  |
|   |    |        |    |        |    |        | TGC/BL/TET/AZI/SMX/CHL          | 0 | 0.00%  | 1 | 1.70% | 0 | 0.00%  |
|   |    |        |    |        |    |        | TGC/BL/QUIN/TET/SMX/TMP         | 1 | 1.70%  | 0 | 0.00% | 0 | 0.00%  |
|   |    |        |    |        |    |        | TGC/QUIN/TET/AZI/SMX/CHL        | 0 | 0.00%  | 1 | 1.70% | 0 | 0.00%  |
|   |    |        |    |        |    |        | TGC/TET/AZI/SMX/CHL/TMP         | 1 | 1.70%  | 0 | 0.00% | 0 | 0.00%  |
|   |    |        |    |        |    |        | TGC/BL/QUIN/TET/CN/SMX/CHL      | 0 | 0.00%  | 1 | 1.70% | 0 | 0.00%  |
|   |    |        |    |        |    |        | BL/QUIN/TET/CN/SMX/CHL/TMP      | 2 | 3.40%  | 3 | 5.20% | 7 | 12.10% |
| 7 | 5  | 8.70%  | 6  | 10.20% | 8  | 13.60% | TGC/BL/QUIN/TET/AZI/SMX/CHL     | 1 | 1.70%  | 0 | 0.00% | 0 | 0.00%  |
|   |    |        |    |        |    |        | TGC/BL/QUIN/TET/SMX/CHL/TMP     | 2 | 3.40%  | 1 | 1.70% | 1 | 1.70%  |
|   |    |        |    |        |    |        | TGC/QUIN/TET/AZI/CN/SMX/TMP     | 0 | 0.00%  | 1 | 1.70% | 0 | 0.00%  |
|   |    |        |    |        |    |        | BL/QUIN/TET/AZI/CN/SMX/CHL/TMP  | 0 | 0.00%  | 1 | 1.70% | 0 | 0.00%  |
| 8 | 1  | 1.70%  | 2  | 3.40%  | 1  | 1.70%  | TGC/BL/QUIN/TET/CN/SMX/CHL/TMP  | 0 | 0.00%  | 1 | 1.70% | 0 | 0.00%  |
|   |    |        |    |        |    |        | TGC/BL/QUIN/TET/AZI/CN/SMX/TMP  | 1 | 1.70%  | 0 | 0.00% | 0 | 0.00%  |
|   |    |        |    |        |    |        | TGC/BL/QUIN/TET/AZI/SMX/CHL/TMP | 0 | 0.00%  | 0 | 0.00% | 1 | 1.70%  |

BL = beta-lactams (MERO, FOT, TAZ, AMP); QUIN = quinolones (CIP, NA), SMX = sulfamethoxazole, TET = tetracycline, CN = gentamicin, TGC = tigecycline, AZI = azitromycin, CHL = chloramphenicol, TMP = trimethoprim.
